# Supplementary material
Source: HighWire-hosted journal article supplement (https://www.cmajopen.ca/highwire/filestream/81276/field_highwire_adjunct_files/1/Original_submission.pdf)

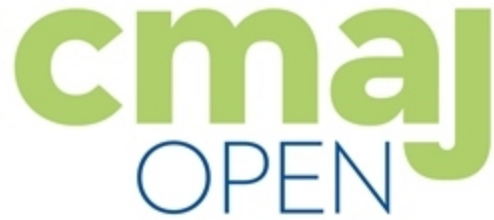

**Specialists and Family Physicians in Interprofessional Teams – Shifting Perspectives in Caring for Patients with Multimorbidity: A Qualitative Study**

|                               |                                                                                                                                                                                                                                                                                                                                                                                                                                                                                                                                                                                                                                                                                                                                                                                                                                                                                                                                                                                                                                                                                                                                                                                                                                                                                   |
|-------------------------------|-----------------------------------------------------------------------------------------------------------------------------------------------------------------------------------------------------------------------------------------------------------------------------------------------------------------------------------------------------------------------------------------------------------------------------------------------------------------------------------------------------------------------------------------------------------------------------------------------------------------------------------------------------------------------------------------------------------------------------------------------------------------------------------------------------------------------------------------------------------------------------------------------------------------------------------------------------------------------------------------------------------------------------------------------------------------------------------------------------------------------------------------------------------------------------------------------------------------------------------------------------------------------------------|
| Journal:                      | <i>CMAJ Open</i>                                                                                                                                                                                                                                                                                                                                                                                                                                                                                                                                                                                                                                                                                                                                                                                                                                                                                                                                                                                                                                                                                                                                                                                                                                                                  |
| Manuscript ID                 | CMAJOpen-2019-0222                                                                                                                                                                                                                                                                                                                                                                                                                                                                                                                                                                                                                                                                                                                                                                                                                                                                                                                                                                                                                                                                                                                                                                                                                                                                |
| Manuscript Type:              | Qualitative                                                                                                                                                                                                                                                                                                                                                                                                                                                                                                                                                                                                                                                                                                                                                                                                                                                                                                                                                                                                                                                                                                                                                                                                                                                                       |
| Date Submitted by the Author: | 09-Dec-2019                                                                                                                                                                                                                                                                                                                                                                                                                                                                                                                                                                                                                                                                                                                                                                                                                                                                                                                                                                                                                                                                                                                                                                                                                                                                       |
| Complete List of Authors:     | Boeckxstaens, Pauline; Ghent University, Family Medicine and Primary Healthcare<br>Brown, Judith Belle; Western University, Family Medicine<br>Reichert, Sonja; Western University, Family Medicine<br>Smith, Christopher; Toronto East Health Network Michael Garron Hospital, Medicine<br>Stewart, Moira; Western University, Family Medicine<br>Fortin, Martin; Universite de Sherbrooke, Department of Family Medicine and Emergency Medicine                                                                                                                                                                                                                                                                                                                                                                                                                                                                                                                                                                                                                                                                                                                                                                                                                                 |
| More Detailed Keywords:       | Multimorbidity, Interprofessional collaboration, Specialists, Family Physicians, Team                                                                                                                                                                                                                                                                                                                                                                                                                                                                                                                                                                                                                                                                                                                                                                                                                                                                                                                                                                                                                                                                                                                                                                                             |
| Keywords:                     | Communication, Family medicine, general practice, primary care, Health services research, Qualitative research                                                                                                                                                                                                                                                                                                                                                                                                                                                                                                                                                                                                                                                                                                                                                                                                                                                                                                                                                                                                                                                                                                                                                                    |
| Abstract:                     | <p><b>Background:</b><br/>Patients with multimorbidity encounter fragmentation, conflicting information, and gaps in care. They often require services across different healthcare settings, yet team processes among settings are rarely implemented. The study explored perceptions of specialists and family physicians collaborating in a telemedicine interprofessional consultation for patients with multimorbidity (TIP/IMPACT) to better understand the value of bringing together physicians across the boundaries of health care settings.</p> <p><b>Methods:</b><br/>This is a descriptive qualitative, interview-based study. The participants included nine specialists and six family physicians who previously participated in a TIP/IMPACT clinic. An iterative and interpretive process was conducted with both individual and team analysis to identify themes.</p> <p><b>Results:</b><br/>Three themes emerged in the analysis: 1) perceived benefits of practicing in an interprofessional team model that facilitated a transfer of knowledge, skills and attitudes; 2) the shift from a consultant model to an interprofessional team model, allowing a window into the community, extending discussions beyond the medical model, and focusing on the</p> |

1  
2  
3  
4  
5  
6  
7  
8  
9  
10  
11  
12  
13  
14  
15  
16  
17  
18  
19  
20  
21  
22  
23  
24  
25  
26  
27  
28  
29  
30  
31  
32  
33  
34  
35  
36  
37  
38  
39  
40  
41  
42  
43  
44  
45  
46  
47  
48  
49  
50  
51  
52  
53  
54  
55  
56  
57  
58  
59  
60

|  |                                                                                                                                                                                                                                                                                                                                                                                                                                                                                                                                                                                                                                                                                                                                       |
|--|---------------------------------------------------------------------------------------------------------------------------------------------------------------------------------------------------------------------------------------------------------------------------------------------------------------------------------------------------------------------------------------------------------------------------------------------------------------------------------------------------------------------------------------------------------------------------------------------------------------------------------------------------------------------------------------------------------------------------------------|
|  | <p>patient's health in context; and 3) benefits for trainees including learning about interprofessional collaboration and gaining exposure to a 'real-world' model for caring for people with multimorbidity in outpatient/community settings.</p> <p>Interpretation:<br/>These results demonstrate that the TIP/IMPACT program provides a model of care for patients with multimorbidity in which providers across different settings and disciplines create a synergy. By creating new knowledge through collaboration rather than just circulating knowledge between professionals, this model adds new perspectives to the care of complex patients with multimorbidity and provides additional personal and system benefits.</p> |
|  |                                                                                                                                                                                                                                                                                                                                                                                                                                                                                                                                                                                                                                                                                                                                       |

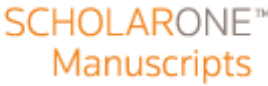

**Manuscript:** Specialists and Family Physicians in Interprofessional Teams – Shifting Perspectives in Caring for Patients with Multimorbidity: A Qualitative Study

## Consolidated criteria for reporting qualitative studies (COREQ): 32-item checklist

Developed from:

Tong A, Sainsbury P, Craig J. Consolidated criteria for reporting qualitative research (COREQ): a 32-item checklist for interviews and focus groups. *International Journal for Quality in Health Care*. 2007. Volume 19, Number 6: pp. 349 – 357

| No. Item                                       | Guide questions/description                                                                                                                              | Reported on Page # |
|------------------------------------------------|----------------------------------------------------------------------------------------------------------------------------------------------------------|--------------------|
| <b>Domain 1: Research team and reflexivity</b> |                                                                                                                                                          |                    |
| <i>Personal Characteristics</i>                |                                                                                                                                                          |                    |
| 1. Interviewer/facilitator                     | Which author/s conducted the interview or focus group?                                                                                                   | Page 6             |
| 2. Credentials                                 | What were the researcher's credentials? E.g. PhD, MD                                                                                                     | Page 1             |
| 3. Occupation                                  | What was their occupation at the time of the study?                                                                                                      | Page 1             |
| 4. Gender                                      | Was the researcher male or female?                                                                                                                       | Page 1 and 6       |
| 5. Experience and training                     | What experience or training did the researcher have?                                                                                                     | Page 1 and 7       |
| <i>Relationship with participants</i>          |                                                                                                                                                          |                    |
| 6. Relationship established                    | Was a relationship established prior to study commencement?                                                                                              | Page 6             |
| 7. Participant knowledge of the interviewer    | What did the participants know about the researcher? e.g. personal goals, reasons for doing the research                                                 | Page 6             |
| 8. Interviewer characteristics                 | What characteristics were reported about the interviewer/facilitator? e.g. Bias, assumptions, reasons and interests in the research topic                | Page 7             |
| <b>Domain 2: study design</b>                  |                                                                                                                                                          |                    |
| <i>Theoretical framework</i>                   |                                                                                                                                                          |                    |
| 9. Methodological orientation and Theory       | What methodological orientation was stated to underpin the study? e.g. grounded theory, discourse analysis, ethnography, phenomenology, content analysis | Page 6             |
| <i>Participant selection</i>                   |                                                                                                                                                          |                    |
| 10. Sampling                                   | How were participants selected? e.g. purposive, convenience, consecutive, snowball                                                                       | Page 5 and 6       |
| 11. Method of approach                         | How were participants approached? e.g. face-to-face, telephone, mail, email                                                                              | Page 6             |
| 12. Sample size                                | How many participants were in the study?                                                                                                                 | Table 1            |
| 13. Non-participation                          | How many people refused to participate or                                                                                                                | N/A Page 6         |

|                                        |                                                                                                                                 |                                                     |
|----------------------------------------|---------------------------------------------------------------------------------------------------------------------------------|-----------------------------------------------------|
|                                        | dropped out? Reasons?                                                                                                           |                                                     |
| <i>Setting</i>                         |                                                                                                                                 |                                                     |
| 14. Setting of data collection         | Where was the data collected? e.g. home, clinic, workplace                                                                      | Page 6                                              |
| 15. Presence of non-participants       | Was anyone else present besides the participants and researchers?                                                               | Page 6                                              |
| 16. Description of sample              | What are the important characteristics of the sample? e.g. demographic data, date                                               | Table 1                                             |
| <i>Data collection</i>                 |                                                                                                                                 |                                                     |
| 17. Interview guide                    | Were questions, prompts, guides provided by the authors? Was it pilot tested?                                                   | Page 6, not pilot tested                            |
| 18. Repeat interviews                  | Were repeat inter views carried out? If yes, how many?                                                                          | No                                                  |
| 19. Audio/visual recording             | Did the research use audio or visual recording to collect the data?                                                             | Page 6                                              |
| 20. Field notes                        | Were field notes made during and/or after the inter view or focus group?                                                        | Page 7                                              |
| 21. Duration                           | What was the duration of the inter views or focus group?                                                                        | Page 6                                              |
| 22. Data saturation                    | Was data saturation discussed?                                                                                                  | Page 6                                              |
| 23. Transcripts returned               | Were transcripts returned to participants for comment and/or correction?                                                        | No                                                  |
| <b>Domain 3: analysis and findings</b> |                                                                                                                                 |                                                     |
| <i>Data analysis</i>                   |                                                                                                                                 |                                                     |
| 24. Number of data coders              | How many data coders coded the data?                                                                                            | Page 6                                              |
| 25. Description of the coding tree     | Did authors provide a description of the coding tree?                                                                           | No                                                  |
| 26. Derivation of themes               | Were themes identified in advance or derived from the data?                                                                     | Page 7                                              |
| 27. Software                           | What software, if applicable, was used to manage the data?                                                                      | Page 6                                              |
| 28. Participant checking               | Did participants provide feedback on the findings?                                                                              | No                                                  |
| <i>Reporting</i>                       |                                                                                                                                 |                                                     |
| 29. Quotations presented               | Were participant quotations presented to illustrate the themes/findings? Was each quotation identified? e.g. participant number | Page 7 to 11                                        |
| 30. Data and findings consistent       | Was there consistency between the data presented and the findings?                                                              | Yes, there was. Page 7 to 11                        |
| 31. Clarity of major themes            | Were major themes clearly presented in the findings?                                                                            | Yes they were. From page 7 to 11                    |
| 32. Clarity of minor themes            | Is there a description of diverse cases or discussion of minor themes?                                                          | Discussion of major and minor themes From page 7-11 |

1  
2  
3 Specialists and Family Physicians in Interprofessional Teams – Shifting Perspectives in Caring for  
4  
5 Patients with Multimorbidity: A Qualitative Study  
6  
7  
8  
9

10 Pauline Boeckxstaens, MD, PhD<sup>1</sup>, Judith Belle Brown, PhD<sup>2</sup>, Sonja M. Reichert, MD, MSc<sup>2</sup>,  
11  
12 Christopher N.C. Smith, MD<sup>3</sup>, Moira Stewart, PhD<sup>2</sup>, Martin Fortin, MD, PhD<sup>4</sup>  
13  
14  
15  
16

17 *Word Count for Abstract: 249*

18  
19 *Word Count: 2502*

20  
21 *Number of figures: 1*

22  
23 *Number of tables: 1*

24  
25 *Number of references: 47*  
26  
27

28  
29 <sup>1</sup> *Department of Family Medicine and Primary Healthcare, Ghent University, Belgium*

30  
31 <sup>2</sup> *Centre for Studies in Family Medicine, Department of Family Medicine, Schulich School of  
32 Medicine and Dentistry, Western University, London, Ontario, Canada*

33  
34 <sup>3</sup> *Department of Medicine, Toronto East Health Network, Michael Garron Hospital, Toronto,  
35 Ontario, Canada*

36  
37 <sup>4</sup> *Department of Family Medicine and Emergency Medicine, Université de Sherbrooke, Quebec,  
38 Canada*  
39

40  
41  
42 *Corresponding author:*

43  
44 *Pauline Boeckxstaens, MD, PhD. Department of Public Health and Primary Care, Ghent  
45 University C. Heymanslaan 10, ingang 42 -  
46 verdieping 6 9000 Gent [Pauline.boeckxstaens@ugent.be](mailto:Pauline.boeckxstaens@ugent.be)*  
47  
48  
49

50  
51  
52 ***Key words : multimorbidity, interprofessional collaboration, specialists, family physicians,  
53 team***  
54  
55  
56  
57

**Abstract****Background:**

Patients with multimorbidity encounter fragmentation, conflicting information, and gaps in care. They often require services across different healthcare settings, yet team processes among settings are rarely implemented. The study explored perceptions of specialists and family physicians collaborating in a telemedicine interprofessional consultation for patients with multimorbidity (TIP/IMPACT) to better understand the value of bringing together physicians across the boundaries of health care settings.

**Methods:**

This is a descriptive qualitative, interview-based study. The participants included nine specialists and six family physicians who previously participated in a TIP/IMPACT clinic. An iterative and interpretive process was conducted with both individual and team analysis to identify themes.

**Results:**

Three themes emerged in the analysis: 1) perceived benefits of practicing in an interprofessional team model that facilitated a transfer of knowledge, skills and attitudes; 2) the shift from a consultant model to an interprofessional team model, allowing a window into the community, extending discussions beyond the medical model, and focusing on the patient's health in context; and 3) benefits for trainees including learning about interprofessional collaboration and

1  
2  
3 gaining exposure to a 'real-world' model for caring for people with multimorbidity in  
4  
5 outpatient/community settings.  
6  
7

8  
9 **Interpretation:**

10  
11 These results demonstrate that the TIP/IMPACT program provides a model of care for patients  
12  
13 with multimorbidity in which providers across different settings and disciplines create a synergy.  
14  
15 By creating new knowledge through collaboration rather than just circulating knowledge  
16  
17 between professionals, this model adds new perspectives to the care of complex patients with  
18  
19 multimorbidity and provides additional personal and system benefits.  
20  
21  
22  
23  
24  
25  
26  
27  
28  
29  
30  
31  
32  
33  
34  
35  
36  
37  
38  
39  
40  
41  
42  
43  
44  
45  
46  
47  
48  
49  
50  
51  
52  
53  
54  
55  
56  
57  
58  
59  
60

Confidential

## INTRODUCTION

People increasingly suffer from multiple chronic conditions. Together with the rise in multimorbidity and the increasing complexity of health care, there is often an exponential increase in the number of healthcare professionals involved in the patient's care. (1) A report from the Netherlands on care for people with chronic diseases indicated that these patients visit 4-9 professionals regularly.(2) Patients report concerns with multiple appointments, confusion about who is caring for them, inadequate and conflicting information, communication problems with and amongst clinicians, and lack of access to specialist care.(3) Interprofessional teamwork has been demonstrated to contribute to both quality of care and control of costs.(4-7) Exploring the experiences of providers working in teams has provided valuable insights into the key features of successful interprofessional teamwork.(8-9) However, most research in this field has focussed on primary health care teams or teams collaborating within hospitals or residential settings.(10-11) People with multimorbidity require care from providers across settings, which often include primary care, secondary care and community care. Because clinical care is often organized according to the care setting, team processes that extend beyond these traditional boundaries are rarely implemented.(12) Studies examining a variety of settings including oncology, palliative, pediatrics and memory clinics have demonstrated that the interfaces between primary and secondary care are fraught with challenges to effective teamwork.(13-15) These interprofessional teams consist of multiple providers. Often, primary care and specialist physicians do not have a clear understanding of each other's skill sets and responsibilities, and experience challenges in delivering timely and appropriate communication to each other. Some of these barriers can be removed when the quality of the relationships between primary and



1  
2  
3 secondary providers improves and when back-and-forth communication is more seamless.(16)  
4  
5  
6 The literature about team performance in low-acuity settings is minimal and there is a lack of  
7  
8 specific recommendations on how to actually improve these collaborations.(17) Contributing to  
9  
10 these challenges, is the lack of inter professional collaboration during both primary care and  
11  
12 specialist education and training.(18) Despite multiple professional bodies recommending  
13  
14 interprofessional collaboration as a core competence(19-21), providers are frequently left with  
15  
16 unstructured and implicit learning, often happening only during forced interactions.(22)  
17  
18  
19  
20  
21 Concurrently, providers in practice are developing and implementing innovative strategies to  
22  
23 address the challenges of interprofessional care for complex patients with multimorbidity. One  
24  
25 such example is the Telemedicine Interprofessional Model of Practice for Aging and Complex  
26  
27 Treatments (TIP/IMPACT) clinic, which provides an interprofessional primary care consultation  
28  
29 model for these patients. The current paper explores the perceptions of specialists and family  
30  
31 physicians collaborating within interprofessional team meetings for patients with  
32  
33 multimorbidity in order to better understand the value of bringing together physicians across  
34  
35 the boundaries of different health care settings.  
36  
37  
38  
39  
40

## 41 **METHODS**

### 42 ***Design***

43  
44  
45 This paper used a qualitative descriptive approach to explore the role of specialists participating  
46  
47 on an innovative primary health care interprofessional team model.(23-25) See Figure 1 for an  
48  
49 overview of the intervention.(26)  
50  
51  
52  
53

### 54 ***Participants***

## Participant Recruitment

Program Leads recruited a purposive sample of family physicians and specialists who previously participated in a TIP/IMPACT clinic. Contact with all participants was made either by phone or email to confirm participation. Informed consent was obtained and confidentiality was assured.

Final sample see table 1.

## ***Approach***

### Data Collection

Semi-structured individual interviews were conducted at the participants' practice location. Participants were asked to describe their experience of being a member of this interprofessional team model. The interviews, lasting from 30-60 minutes in duration, were audiotaped and transcribed verbatim. PB, JBB, SMR and two research assistants conducted the interviews.

### Data Analysis

The data analysis was both iterative and interpretive. For the first phase of analysis, each transcript was reviewed and coded individually by PB, JBB, SMR to determine key concepts emerging from the data. Next, meeting as a team they examined their independent coding, culminating in the initial coding template. This process was repeated until all the interviews were analyzed, the coding template deemed comprehensive and complete and data sufficiency had been achieved. Once the main themes and sub-themes were input into QSR International's NVivo 10, PB, JBB and SMR reviewed the NVivo data to identify the overarching themes and

1  
2  
3 exemplar quotes. The data reported in this paper reflects the participants' spontaneous  
4  
5 comments and reflections and were not in response to a specific question.  
6  
7

#### 8 9 Trustworthiness and Credibility

10  
11 The trustworthiness and credibility of the analysis was ensured by using verbatim transcripts,  
12  
13 independent and team analysis, and field notes written post-interview. A commitment to  
14  
15 reflexivity considered how the researchers' professional backgrounds (e.g., social work, family  
16  
17 medicine, internal medicine, epidemiology), particularly during the analysis phase , could  
18  
19 influence the findings.  
20  
21  
22  
23

#### 24 25 Ethics Approval

26  
27  
28 Ethics approval was received from the Health Sciences Research Ethics Board of Western  
29  
30 University (106921).  
31  
32

### 33 34 **RESULTS**

35  
36 Three overarching themes emerged from the data: (1) benefits of practicing in an  
37  
38 interprofessional team including appreciation of the knowledge, skills and attitudes of various  
39  
40 team members; (2) the shift from a consultant model to an interprofessional team model and;  
41  
42 (3) opportunities for learners in an interprofessional outpatient team setting.  
43  
44  
45

#### 46 47 (1) Creating new perspectives on care for multimorbidity by sharing knowledge, skills and 48 49 attitudes 50

51  
52 All of the participants expressed the value of learning from other team members through a  
53  
54 transfer of knowledge, skills and experience. *"I learn a lot from hearing other health care*  
55  
56  
57

1  
2  
3 *professionals and their take on some of the patient's problems." (Psych)* Working in an  
4  
5  
6 interprofessional team enhanced their understanding of the unique contributions of other team  
7  
8 members. *"You see what the other people are thinking of - the different styles." (Psych)*  
9

10  
11 Participants described how collaborating as a team validated the complexity of the patient's  
12  
13 situation and the need to consider different aspects contributing to the patient's challenges. *"It*  
14  
15 *just validates that there's a lot of different perspectives to look at.... So I think it educates the*  
16  
17 *group in that way and models this need to think of what different things are going on." (Psych)*  
18  
19

20  
21 Collaborating together as a team provided added value with a shift from a single disease focus  
22  
23 to an exploration of the various components of a patient's multimorbidity.  
24  
25

26  
27 "There's an added value by far. ... because they have multiple things going on, social,  
28  
29 functional, cognitive, medical. It really is useful having that full interdisciplinary team for  
30  
31 these particular patients." (Geri)  
32  
33

34  
35 The specialist participants explained the difference between receiving a case summary versus  
36  
37 hearing and discussing the patient's situation in an interprofessional team setting.  
38  
39

40  
41 " When I get the case summary and then I hear input from an internist or a family  
42  
43 doctor. Oh wow, that was interesting! I wonder why that hadn't been addressed or  
44  
45 that's a wrinkle I certainly didn't think of before." (Psych)  
46  
47

48  
49 Another key benefit of the interprofessional team was the opportunity to discuss various  
50  
51 aspects of the patient's problems.  
52  
53  
54  
55  
56  
57  
58  
59  
60

1  
2  
3 “I think the greatest benefit is that because we’re all sitting down together at the same  
4  
5 table we can talk about how these things interact and intersect. So for example,  
6  
7 pharmacy can talk about adverse drug interactions that may be contributing to mental  
8  
9 illness or making it worse. And then together with social work at the table we can all  
10  
11 comment on how we think this is impacting activities of daily living.” (GIM)  
12  
13  
14  
15

16 Engaging the patient with an interprofessional team of providers at one time, in one location,  
17  
18 was described as synergistic. *“I think there’s something synergistic about having all those people  
19  
20 together and you can build on each other’s thoughts and possible avenues.” (FP)*. A prerequisite  
21  
22 for this to successfully transpire was team members having a well-developed and strong  
23  
24 professional identity. *“You really need people who have the skills in their discipline at a very high  
25  
26 level. ... it’s not a show for amateurs.” (FP)*  
27  
28  
29  
30

## 31 (2) Moving away from a consultant model to an interprofessional team model

32  
33

34 Specialist participants articulated how the interprofessional model based in primary care helped  
35  
36 them to understand the patient’s experiences outside the walls of the hospital. The experience  
37  
38 provided a window into the community, encouraging them to try to understand all facets of the  
39  
40 participant’s life. *“Because the environment is present in the picture (telemedicine) people are  
41  
42 asking more questions about that kind of stuff than I am used to seeing.” (GIM)*. While adopting  
43  
44 this interprofessional model for patients with multimorbidity, specialists were actively  
45  
46 considering how care could be best provided and supported. *“This is really about brainstorming  
47  
48 with this patient and family physician about how can we better meet their needs.” (FP)*. Being a  
49  
50 member of the interprofessional team increased the specialist’s awareness and respect for  
51  
52  
53  
54  
55  
56  
57  
58  
59  
60

1  
2  
3 family physician's roles and consequently enabled them to provide relevant recommendations  
4  
5 within the context of primary care. *"I think the family doctors feel very well respected by the*  
6  
7 *specialists and the specialists are always very supportive in terms of giving ideas that could be*  
8  
9 *readily implemented in primary care."* (FP)  
10  
11  
12

13  
14 Participating in the interprofessional team exposed the specialist participants to a different  
15  
16 practice model requiring them to relinquish the traditional consult model.  
17  
18

19 "It takes a special kind of consultant to do this because you're not examining the patient.  
20  
21 You can't get a very traditional specialist to do this, because they're really used to having  
22  
23 all the I's dotted and the T's crossed." (FP)  
24  
25  
26

27  
28 Specialist participants described how they could be more accessible to this patient population in  
29  
30 comparison to the traditional consultation model.  
31  
32

33 "I'm not going to have everything done as beautifully as I want, but these patients  
34  
35 wouldn't have been able to easily get to my clinic otherwise. And if I can provide a little bit  
36  
37 of help and support, then at least I'm getting the patient moving in the right direction."  
38  
39  
40 (Geri)  
41  
42

43  
44 Participants explained how working on this interprofessional team required specialists to extend  
45  
46 beyond the traditional medical model and alter their focus from labelling the disease to  
47  
48 understanding the patient's issues and needs.  
49  
50

51 "An internist would want to label a disease and with this disease comes an investigation  
52  
53 and a treatment that is doctor-driven, evidence-base driven. Whereas with (The Program),  
54  
55  
56  
57  
58  
59  
60

1  
2  
3 it's completely turned around. The treatment, the drug, the investigation will be driven by  
4  
5 what the patient wants." (GIM)  
6  
7

### 8 9 (3) Opportunities for learners

10  
11 Participants explained how the program addresses important gaps in medical education. First,  
12  
13 learners are not routinely well trained in outpatient care. *"These models aren't formally part of*  
14  
15 *educational practice...Everybody talks about how the future of medicine is outpatient, but that's*  
16  
17 *not the way they're necessarily being trained". (GIM). Second, teachers are traditionally not*  
18  
19 *practicing within an interprofessional care model, leaving trainees without the necessary role*  
20  
21 *models. "Very few people know how to do interprofessional care; not professionals performing*  
22  
23 *side-by-side, but actually interprofessionally... Often what's called interprofessional is not, it's*  
24  
25 *still parallel play." (GIM)*  
26  
27  
28  
29  
30

31  
32 Thirdly, participants described the Program as a model for learning how to care for patients with  
33  
34 multimorbidity within the community. *"These trainees in ambulatory care need to be in the*  
35  
36 *community, need to be on interprofessional teams. That's the way of dealing with these very*  
37  
38 *complex patients." (FP). Participating as a learner in the Program's interprofessional teams was*  
39  
40 *felt to be relevant for trainees across different disciplines. " Whether you are a social work*  
41  
42 *student, a medical student, a psychology student, it allows you to foster that model of*  
43  
44 *interdisciplinary care." (Psych).*  
45  
46  
47  
48  
49

### 50 **INTERPRETATION**

51  
52  
53 Our study describing family physicians' and specialists' perceptions of an interprofessional  
54  
55 consultation for patients with multimorbidity revealed their perceived benefits of this type of  
56  
57

1  
2  
3 program in caring for this population. The success of the Program may come from its merger of  
4  
5 different facilitators for learning through collaboration that have previously been identified in  
6  
7 the literature.  
8  
9

10  
11 First, the Program was felt to facilitate a transfer of knowledge, skills and attitudes, which  
12  
13 enabled teams to create novel perspectives of practice and new knowledge in care for people  
14  
15 with multimorbidity. One of the main facilitators appeared to be the synchronous one-time  
16  
17 collaboration instead of the traditional asynchronous circulation of patient information amongst  
18  
19 providers.(27-29) The Program demonstrated a synergy with the 'communities of practice'  
20  
21 learning model(30) which is based on learning through participation, doing things together and  
22  
23 discussing with one another, which is different from Bandura's social cognitive learning  
24  
25 theory(31) that traditionally focuses on observation, imitation and modeling other  
26  
27 professionals.(32) In this way, the Program overcame important barriers described in the  
28  
29 literature, such as understanding each other's roles and responsibilities and timely and  
30  
31 appropriate communication.(13-15)  
32  
33  
34  
35  
36  
37

38  
39 Second, participants described a shift from a consultant model to an interprofessional team  
40  
41 model, facilitating specialist practice beyond the clinical expert model. Professionals who adopt  
42  
43 the role of the clinical expert have been described as finding it more difficult to assimilate their  
44  
45 knowledge in an interprofessional consultation process.(27) In the Program, participants  
46  
47 explained how specialists were able to contextualize and relate their expert knowledge to the  
48  
49 patient situation by adopting a patient-centered approach focused on the person in the  
50  
51 community. A shared responsibility for the patient within the context of shared values focused  
52  
53 on patient-centered care has also been elicited as an important facilitator for interprofessional  
54  
55  
56  
57  
58  
59  
60



1  
2  
3 learning.(33-35) The literature also describes a more realistic and relevant view on medicine,  
4 providing insight and awareness of one's own and others professional possibilities and roles.(36-  
5  
6  
7  
8 40)  
9

10  
11 Third, the Program was described as an important educational opportunity for trainees. Clinical  
12 training for patients with multimorbidity is typically hospital-based and single-system-focused  
13 with a strong emphasis on the traditional consultation model. The Program provides a model to  
14 address the current lack of established methods for trainees to learn interprofessional  
15 collaboration across the primary-secondary-tertiary care divide.(41-42, 22, 43-45) In this  
16 context, discussing complex patient cases and creating a collaborative care plan has been  
17 described as both a care delivery and teaching strategy.(46-47) Consequently, the Program can  
18 provide opportunities for trainees to learn about interprofessional collaboration in the field and  
19 gain exposure to a 'real-world' model for caring for people with multimorbidity in  
20 outpatient/community settings.  
21  
22  
23  
24  
25  
26  
27  
28  
29  
30  
31  
32  
33  
34  
35

### 36 Limitations

37  
38  
39 The sample was limited to one program and may not be transferable. However, the experiences  
40 may resonate with other physicians in similar programs. An important limitation of this study is  
41 that the perceptions of specialist and family physicians was not a predefined research question  
42 of this study. Rather the perceived benefits of this program for interprofessional collaboration  
43 across settings spontaneously emerged in the analysis. Future studies require a deeper  
44 exploration of the experiences of both specialists and family physicians working collaboratively  
45 in an interprofessional team model. Also, while the educational needs of trainees in caring for  
46  
47  
48  
49  
50  
51  
52  
53  
54  
55  
56  
57  
58  
59  
60

1  
2  
3 patients with multimorbidity were raised by our study participants, we did not explore the  
4  
5 perceptions and experiences of the learners, hence further studies would be valuable in this  
6  
7 area.  
8  
9

## 10 11 Conclusions

12  
13  
14 Overall, we can conclude that family physicians and specialists participating in TIP/IMPACT  
15  
16 believe the Program improves their knowledge and skills, while also serving both as an effective  
17  
18 care delivery and teaching strategy. The insights gained through the Program can add to the  
19  
20 knowledge base of how to care for patients with multimorbidity, while simultaneously  
21  
22 supporting the formal and informal training of physicians and learners at all levels in the  
23  
24 management of these patients. Ongoing description and evaluation of similar practice-based  
25  
26 programs is required to further explore these perceived interprofessional and educational  
27  
28 benefits.  
29  
30  
31  
32  
33  
34  
35  
36  
37  
38  
39  
40  
41  
42  
43  
44  
45  
46  
47  
48  
49  
50  
51  
52  
53  
54  
55  
56  
57  
58  
59  
60

## Acknowledgements

### Contributors Statement:

Drs. Pauline Boeckxstaens, Judith Belle Brown and Sonja Reichert contributed substantially to conception and design, acquisition of data, analysis and interpretation of data. Dr. Christopher N.C. Smith contributed to the design of the project and writing of the manuscript. Drs. Moira Stewart and Martin Fortin contributed substantially to the design of the project. All of the authors revised the manuscript critically for important intellectual content. All authors approved the final version to be published and agreed to be accountable for all aspects of the work.

### Funders:

The 'Patient- Centred Innovations for Persons with Multimorbidity (PACE in MM)' grant is supported by the Canadian Institutes of Health Research's Signature Initiative in Community-based Primary Healthcare (<http://www.cihr-irsc.gc.ca/e/43626.html> )

Dr. Moira Stewart was funded by the Dr. Brian W. Gilbert Canada Research Chair in Primary Health Care Research (2003-2017).

Dr. Pauline Boeckxstaens was supported by a post-doctoral fellowship at the Université de Sherbrooke and was a Transdisciplinary Understanding and Training on Research - Primary Health Care (TUTOR-PHC) Trainee April 2016-March 2017.

Dr. Sonja Reichert now holds the Dr. Brian W. Gilbert Chair in Primary Health Care (2019-2024)

### Prior presentation:

1  
2  
3  
4  
5  
6  
7  
8  
9  
10  
11  
12  
13  
14  
15  
16  
17  
18  
19  
20  
21  
22  
23  
24  
25  
26  
27  
28  
29  
30  
31  
32  
33  
34  
35  
36  
37  
38  
39  
40  
41  
42  
43  
44  
45  
46  
47  
48  
49  
50  
51  
52  
53  
54  
55  
56  
57  
58  
59  
60

46th Annual North American Primary Care Research Group (NAPCRG) Meeting, 2018 Nov 13,  
Chicago, Illinois, United States.

No conflicts of interest

Confidential

## REFERENCES

1. Terner M, Reason B, McKeag AM, Tipper B, Webster G. Chronic conditions more than age drive health system use in Canadian seniors. *Healthc Q*. 2011;14(3):19-22.
2. Jansen D, Spreeuwenberg P, Heijmans M. Ontwikkelingen in de zorg voor chronisch zieken. Rapportage 2012. NIVEL. ISBN 978-94-6122-168-1.
3. Adeniji C, Kenning C, Coventry P, Bower P. What are the core predictors of 'hassles' among patients with multimorbidity in primary care? A cross sectional study. *BMC Health Services Research* 2015;15:255. doi:10.1186/s12913-015-0927-8
4. Xyrichis A, Lowton K. What fosters or prevents interprofessional teamworking in primary and community care? A literature review. *Int J Nurs Stud*. 2008;45(1):140-53.
5. Mickan SM. Evaluating the effectiveness of health care teams. *Aust Health Rev*. 2005; 29(2):211-7.
6. Barrett J, Curran V, Glynn L, Godwin M. CHSRF synthesis: Interprofessional collaboration and quality primary healthcare. Ottawa, ON: Canadian Health Services Research Foundation; 2007. 48 p. Available from [https://www.cfhi-fcass.ca/Migrated/PDF/ResearchReports/CommissionedResearch/SynthesisReport\\_E\\_rev4\\_FINAL.pdf](https://www.cfhi-fcass.ca/Migrated/PDF/ResearchReports/CommissionedResearch/SynthesisReport_E_rev4_FINAL.pdf)
7. Reeves S, Pelone F, Harrison R, Goldman J, Zwarenstein M. Interprofessional collaboration to improve professional practice and healthcare outcomes. *Cochrane Database of Systematic Reviews*; 2017, Issue 6. Art. No.: CD000072. doi: 10.1002/14651858.CD000072.pub3.

- 1  
2  
3 8. Kennedy N, Armstrong C, Woodward O, Cullen W. Primary care team working in Ireland: a  
4  
5 qualitative exploration of team members' experiences in a new primary care service. Health  
6  
7 Soc Care Community. 2015;23 (4): 362-70. doi:10.1111/hsc.12150  
8  
9
- 10 9. Sommers LS, Marton KI, Barbaccia JC, Randolph J. Physician, nurse and social worker  
11  
12 collaboration in primary care for chronically ill seniors. Arch Intern Med. 2000; 160 (12):  
13  
14 1825-33. doi:10.1001/archinte.160.12.1825  
15  
16
- 17 10. van Dongen JJ, van Bokhoven MA, Daniëls R, van der Weijden T, Emonts WW, Beurskens A.  
18  
19 Developing interprofessional care plans in chronic care: a scoping review. BMC Fam Pract.  
20  
21 2016;17(1):137. doi:10.1186/s12875-016-0535-7  
22  
23
- 24 11. Brown JB, Ryan BL, Thorpe C. Processes of patient-centred care in Family Health Teams: a  
25  
26 qualitative study. CMAJ Open. 2016 Apr-Jun; 4(2):E271–E276. Published 2016 Jun 1.  
27  
28 doi:10.9778/cmajo.20150128  
29  
30
- 31 12. van Dijk-de Vries A, van Dongen JJ, van Bokhoven MA. Sustainable interprofessional  
32  
33 teamwork needs a team-friendly healthcare system: experiences from a collaborative Dutch  
34  
35 programme. J Interprof Care. 2017;31(2):167-169. Epub 2016 Dec 5.  
36  
37 DOI: [10.1080/13561820.2016.1237481](https://doi.org/10.1080/13561820.2016.1237481)  
38  
39
- 40 13. Gardiner C, Gott M, Ingleton C. Factors supporting good partnership working between  
41  
42 generalist and specialist palliative care services: a systematic review. Br J Gen Pract. 2012;62  
43  
44 (598):e353-62. DOI: 10.3399/bjgp12X641474  
45  
46  
47
- 48 14. Dossett LA, Hudson JN, Morris AM, et al. The primary care provider (PCP)-cancer specialist  
49  
50 relationship: a systematic review and mixed-methods meta-synthesis. CA Cancer J Clin.  
51  
52 2017;67(2):156-169. Epub 2016 Oct 11. doi:10.3322/caac.21385  
53  
54  
55  
56  
57

- 1  
2  
3 15. Stille CJ, McLaughlin TJ, Primack WA, Mazor KM, Wasserman RC. Determinants and impact  
4 of generalist-specialist communication about pediatric outpatient referrals. *Pediatrics*.  
5  
6 2006;118(4):1341-9. DOI: 10.1542/peds.2005-3010  
7  
8  
9  
10  
11 16. Sampson R, Barbour R, Wilson P. The relationship between GPs and hospital consultants and  
12 the implications for patient care: a qualitative study. *BMC Fam Pract*. 2016;17(45).  
13  
14 doi:10.1186/s12875-016-0442-y  
15  
16  
17  
18 17. van Schaik SM, O'Brien BC, Almeida SA, Adler SR. Perceptions of interprofessional teamwork  
19 in low-acuity settings: a qualitative analysis. *Med Educ*. 2014;48(6):583-92. doi:  
20  
21 10.1111/medu.12424  
22  
23  
24  
25 18. Chang A, Bowen JL, Buranosky RA, Frankel RM, Ghosh N, Rosenblum MJ, et al. Transforming  
26 primary care training--patient-centered medical home entrustable professional activities for  
27 internal medicine residents. *J Gen Intern Med*. 2013;28(6):801-9. doi:10.1007/s11606-012-  
28  
29 2193-3  
30  
31  
32  
33  
34  
35 19. Interprofessional Education Collaborative. Core competencies for interprofessional  
36 collaborative practice: 2016 update. Washington, DC: Interprofessional Education  
37 Collaborative; 2016. Available from: [https://hsc.unm.edu/ipe/resources/ipec-2016-core-](https://hsc.unm.edu/ipe/resources/ipec-2016-core-competencies.pdf)  
38  
39 [competencies.pdf](https://hsc.unm.edu/ipe/resources/ipec-2016-core-competencies.pdf)  
40  
41  
42  
43  
44  
45 20. Frank J. The CanMEDS 2005 Physician Competency Framework. Better Standards. Better  
46 Physicians. Better Care. Ottawa, ON: Royal College of Physicians and Surgeons of Canada;  
47  
48 2005. Available from:  
49  
50 [http://www.ub.edu/medicina\\_unitatededucaciomedica/documentos/CanMeds.pdf](http://www.ub.edu/medicina_unitatededucaciomedica/documentos/CanMeds.pdf)  
51  
52  
53  
54  
55  
56  
57  
58  
59  
60

- 1  
2  
3 21. World Health Organization: Framework for Action on Interprofessional Education and  
4 Collaborative Practice. Geneva, WHO, 2010. Available from:  
5  
6 [http://www.who.int/hrh/resources/framework\\_action/en/](http://www.who.int/hrh/resources/framework_action/en/). Accessed July 30, 2019.  
7  
8  
9
- 10 22. Meijer LJ, de Groot E, Blaauw-Westerlaken M, Damoiseaux RA. Intraprofessional  
11 collaboration and learning between specialists and general practitioners during  
12 postgraduate training: a qualitative study. BMC Health Serv Res. 2016;16(a):376.  
13  
14  
15  
16  
17  
18  
19  
20  
21 23. Sandelowski M. Whatever happened to qualitative description? Res Nurs Health.  
22  
23 2000;23(4):334-40. doi:[10.1002/1098-240X\(200008\)23:4<334::AID-NUR9>3.0.CO;2-G](https://doi.org/10.1002/1098-240X(200008)23:4<334::AID-NUR9>3.0.CO;2-G)  
24
- 25 24. Sandelowski M. What's in a name? Qualitative description revisited. Research in Nursing &  
26  
27 Health. 2010;33:77–84. doi:[10.1002/nur.20362](https://doi.org/10.1002/nur.20362)  
28  
29
- 30 25. Thorne S. Interpretive description: Qualitative research for applied practice (2nd ed.). New  
31  
32 York: Routledge; 2016.  
33  
34
- 35 26. Tracy CS, Bell SH, Nickell LA, Charles J, Upshur RE. The IMPACT clinic: innovative model of  
36  
37 interprofessional primary care for elderly patients with complex health care needs. Can Fam  
38  
39 Physician. 2013;59:e148-55.  
40  
41
- 42 27. Pype P, Mertens F, Wens J, Stes A, Van den Eynden B, Deveugele M. Preparing palliative  
43  
44 home care nurses to act as facilitators for physicians' learning: Evaluation of a training  
45  
46 programme. Palliat Med. 2015;29:458–463. [doi.org/10.1177/0269216314560391](https://doi.org/10.1177/0269216314560391)  
47  
48
- 49 28. Collins F, McCray J. 2012. Relationships, learning and team working in UK services for  
50  
51 children. Journal of Integrated Care. 2012;20:39–50. [doi.org/10.1108/14769011211202283](https://doi.org/10.1108/14769011211202283)  
52  
53  
54  
55  
56  
57  
58  
59  
60



- 1  
2  
3 29. Walters L, Prideaux D, Worley P, Greenhill J. Demonstrating the value of longitudinal  
4  
5 integrated placements to general practice preceptors. *Med Educ.* 2011;45:455–463.  
6  
7 [doi.org/10.1111/j.1365-2923.2010.03901.x](https://doi.org/10.1111/j.1365-2923.2010.03901.x)  
8  
9
- 10 30. Lave J, Wenger E. *Situated learning: Legitimate peripheral participation.* Cambridge UK:  
11  
12 Cambridge University Press; 1991.  
13  
14
- 15 31. Bandura A. Social cognitive theory: an agentic perspective. *Annu Rev Psychol.* 2001;52:1–26.  
16  
17
- 18 32. Kenny NP, Mann KV, MacLeod H. Role modeling in physicians' professional formation:  
19  
20 reconsidering an essential but untapped educational strategy. *Acad Med.* 2003;78:1203–  
21  
22 1210.  
23  
24
- 25 33. Jones A. Some benefits experienced by hospice nurses from group clinical supervision. *Eur J*  
26  
27 *Cancer Care.* 2003;12:224–232. doi:[10.1046/j.1365-2354.2003.00405.x](https://doi.org/10.1046/j.1365-2354.2003.00405.x)  
28  
29
- 30 34. Bunniss S, Kelly DR. 'The unknown becomes the known': collective learning and change in  
31  
32 primary care teams. *Med Educ.* 2008;42:1185–1194. doi:[10.1111/j.1365-2923.2008.03159.x](https://doi.org/10.1111/j.1365-2923.2008.03159.x)  
33  
34
- 35 35. Stewart M, Brown JB, Weston W, McWhinney IR, McWilliam CL, Freeman, TR. *Patient-*  
36  
37 *Centered Medicine: Transforming the Clinical Method.* 3rd ed. London, UK: Radcliffe  
38  
39 Publishing; 2014.  
40  
41
- 42 36. Mertens F, de Groot E, Meijer L, et al. Workplace learning through collaboration in primary  
43  
44 healthcare: a BEME realist review of what works, for whom and in what circumstances:  
45  
46 BEME Guide No. 46, *Med Teach.* 2018;40(2):117-134.  
47  
48 DOI: [10.1080/0142159X.2017.1390216](https://doi.org/10.1080/0142159X.2017.1390216)  
49  
50
- 51 37. Marshall MN. Qualitative study of educational interaction between general practitioners and  
52  
53 specialists. *BMJ.* 1998;316:442–445. doi: <https://doi.org/10.1136/bmj.316.7129.442>  
54  
55  
56  
57  
58  
59  
60

- 1  
2  
3 38. Kousgaard MB, Thorsen T. Positive experiences with a specialist as facilitator in general  
4  
5 practice. *Dan Med J*. 2012;59(6):A4443.  
6  
7
- 8 39. Allan H, Bryan K, Clawson L, Smith P. Developing an interprofessional learning culture in  
9  
10 primary care. *J Interprof Care*. 2005;19:452–464. DOI: [10.1080/13561820500215145](https://doi.org/10.1080/13561820500215145)  
11  
12
- 13 40. Carr EC, Worswick L, Wilcock PM, Campion-Smith C, Hettinga D. Improving services for back  
14  
15 pain: putting the patient at the centre of interprofessional education. *Qual Prim Care*.  
16  
17 2012;20:345–353.  
18  
19
- 20 41. Guirguis-Younger M, McNeil R, Runnels V. Learning and knowledge-integration strategies of  
21  
22 nurses and client care workers serving homeless persons. *Can J Nurs Res*. 2009;41:21–34.  
23  
24
- 25 42. Leasure EL, Jones RR, Meade LB, Sanger MI, Thomas KG, Tilden VP, et al. There is no "i" in  
26  
27 teamwork in the patient-centered medical home: defining teamwork competencies for  
28  
29 academic practice. *Acad Med*. 2013;88(5):585-92. doi: 10.1097/ACM.0b013e31828b0289  
30  
31
- 32 43. Kaminetzky CP, Beste LA, Poppe AP, Doan DB, Mun HK, Fugate Woods N, et al.  
33  
34 Implementation of a novel population panel management curriculum among  
35  
36 interprofessional health care trainees. *BMC Med Educ*. 2017;17(1):264. doi:10.1186/s12909-  
37  
38 017-1093-y  
39  
40
- 41 44. Janssen M, Sagasser MH, Laro EAM, de Graaf J, Scherpbier-de Haan ND. Learning  
42  
43 intraprofessional collaboration by participating in a consultation programme: what and how  
44  
45 did primary and secondary care trainees learn? *BMC Med Educ*. 2017;17(1):125.  
46  
47 doi:10.1186/s12909-017-0961-9  
48  
49
- 50 45. Barker M, Lecce J, Ivanova A, Zawertailo L, Dragonetti R, Selby P. Interprofessional  
51  
52 Communities of Practice in Continuing Medical Education for Promoting and Sustaining  
53  
54  
55  
56  
57  
58  
59  
60

1  
2  
3 Practice Change: A Prospective Cohort Study. Journal of Continuing Education in the Health  
4  
5 Professions. Spring 2008;38(2):86-93. doi: 10.1097/CEH.0000000000000191  
6  
7

8 46. MacFarlane A, Harrison R, Murray E, Berlin A, Wallace P. A qualitative study of the  
9  
10 educational potential of joint teleconsultations at the primary-secondary care interface. J  
11  
12 Telemed Telecare. 2006;12 (1\_suppl):22–24. [doi.org/10.1258/13576330677978399](https://doi.org/10.1258/13576330677978399)  
13  
14

15 47. Coppola S, Rosemond C, Greger-Holt N, et al. Arena assessment: evolution of teamwork for  
16  
17 frail older adults. Topics in Geriatric Rehabilitation: March 2002;17(3):13-28.  
18  
19  
20  
21  
22  
23  
24  
25  
26  
27  
28  
29  
30  
31  
32  
33  
34  
35  
36  
37  
38  
39  
40  
41  
42  
43  
44  
45  
46  
47  
48  
49  
50  
51  
52  
53  
54  
55  
56  
57  
58  
59  
60

Confidential

Table 1: Characteristics of Final Sample (n=15)

|                                     |                          |
|-------------------------------------|--------------------------|
| Age                                 | Average 46 (range 34-65) |
| Gender                              | Female 8<br>Male 7       |
| Type of specialty                   |                          |
| Geriatrician                        | 2                        |
| Psychiatrist                        | 3                        |
| General Internist                   | 4                        |
| Family physician                    | 6                        |
| Years of practice                   | Average 13 yrs           |
| Involvement with TIP/IMPACT Program | Range 1-7 yrs            |

Figure 1: Overview of the Program

## TIP: Telemedicine IMPACT Plus

- Patient-centred complex care model for managing **multiple chronic diseases**
- Clinical intervention targeting complex patients at risk for avoidable hospital admission and ED visits
- **One-time**, Ontario Health Insurance Plan (OHIP)-billable interprofessional case consultation by Ontario Telemedicine Network (OTN) videoconferencing technology:

### Goals:

- ✓ Increase access by primary care to local interprofessional resources
- ✓ Make efficient use of existing healthcare resources
- ✓ Reduce avoidable use of acute care resources by enabling patient self-management
- ✓ Improve quality of care and QOL
- ✓ Introduce care coordination

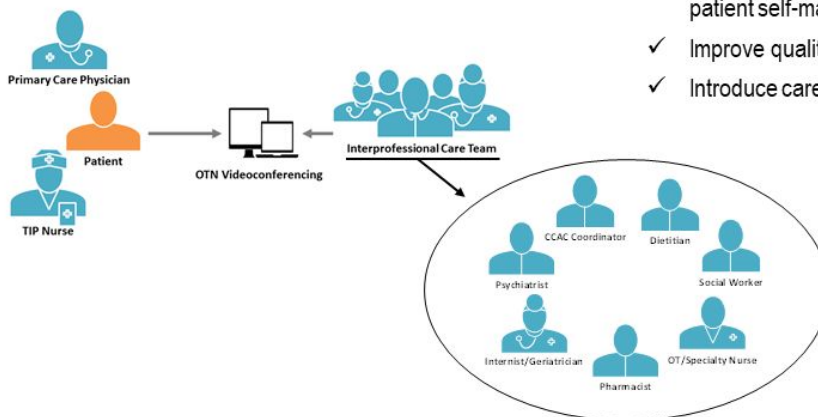

Supplement: Original_submission.pdf [file Original_submission.pdf]
